# Supplementary material for: Kinetic Grain Growth in Firn Induced by Meltwater Infiltration on the Greenland Ice Sheet
Source: Copernicus journal article supplement (doi:10.5194/egusphere-2025-3002), 2025-07-16
Supplement: Supplementary file 1 [file egusphere-2025-3002-supplement.pdf]

# Supplemental Information

## 1 Methods – Site-Specific Simulation

Microstructural properties ascribed to the site-specific simulation firn column are provided in Table S1.

**Table S1: Initial microstructure parameters of the site-specific simulation firn column. Values are uniform across the entire profile initially.**

| Parameter                                    | Value                                      |
|----------------------------------------------|--------------------------------------------|
| Grain radius, all layers (mm)                | 0.8†                                       |
| Bond radius, all layers (mm)                 | 0.25                                       |
| Dendricity, all layers                       | 0                                          |
| Sphericity, all layers                       | 0.5                                        |
| Microstructure parameter ('mk', categorical) | 1 (indicates that snow has become faceted) |

† A grain radius of 0.8mm produces firn grains with sizes slightly smaller than those reported by McDowell et al. (2023)

## 2 Methods – Synthetic Simulations

### 2.1 Spin up

The model was initialized with a 15m-deep synthetic firn profile using the Herron and Langway formulation for increasing  
firn density with depth (Herron and Langway, 1980), assuming a constant new snow density of  $315 \text{ kg m}^{-3}$  (Fausto et al.,  
2018; Howat, 2022) mean annual accumulation rate of  $0.4 \text{ m w.e. yr}^{-1}$  (RACMO, Noël, 2019), and pure ice density of  $917 \text{ kg m}^{-3}$ . A vertical temperature profile and lower Dirichlet boundary condition of  $-16.5^\circ\text{C}$  (Saito et al., 2024) was ascribed to the  
firn column, the MAAT of site CP-1998m. Universal microstructural parameters reflective of percolation zone properties were  
also provided (Table S2). The spin up was forced with a sinusoidal air temperature curve with a 1-year wavelength  
starting/ending on April 1st, amplitude of  $14.5^\circ\text{C}$ , max temperature of  $-2^\circ\text{C}$  and minimum of  $-31^\circ\text{C}$ . All other inputs were set  
constant except precipitation, which occurred randomly and amounted to  $0.4\text{-}0.5 \text{ m w.e. yr}^{-1}$  (Table S2). Forcings were  
provided at hourly timesteps.

### 2.2 Synthetic Wetting Front Simulation

The spin-up output on April 1<sup>st</sup> was used as the starting firn profile for the transient run. Average hourly air temperature (GC-  
NET PROMICE, Steffen et al., 2022) over the calendar year was computed and fit with a sinusoidal, year-length temperature  
curve and a secondary, diurnally fluctuating sinusoid (Fig. S1). Longwave radiation (LWR) was calculated directly from  
temperature using the Stefan-Boltzmann Law. Shortwave radiation (SWR) values were also averaged hourly and trimmed with  
two sinusoidal envelopes to smooth local minima and maxima (Fig. S1). Winter SWR values were set to 0 (Fig. S1).

Precipitation occurred randomly and amounted to 0.5m w.e. yr<sup>-1</sup>. Wind speed, direction, and relative humidity were set equal to spin-up values (Fig. S1). SNOWPACK was configured identically to the site-specific simulation.

**Table S2: Firn profile initial conditions and meteorological forcings, spin-up period for synthetic simulations.**

| Initial Conditions – Microstructure       | Value                                   |
|-------------------------------------------|-----------------------------------------|
| Grain radius (mm)                         | 0.75                                    |
| Bond radius (mm)                          | 0.5                                     |
| Dendricity                                | 0 ('old' snow)                          |
| Sphericity                                | 0.6                                     |
| Microstructure marker ('mk')              | 1 (meaning grains have become faceted') |
| Stress change rate                        | 0                                       |
| Site Information                          | Value                                   |
| Site altitude                             | 1998m                                   |
| Site coordinates                          | 69.872469, -47.036429                   |
| Meteorological Forcings                   | Value                                   |
| Shortwave radiation (W m <sup>-2</sup> )  | 2                                       |
| Longwave radiation (W m <sup>-2</sup> ) † | 300                                     |
| Precipitation (m yr <sup>-1</sup> )       | 0.4-0.5, occuring randomly              |
| Windspeed (m s <sup>-1</sup> )            | 3                                       |
| Wind direction                            | 20                                      |
| Relative humidity                         | 0.61                                    |

† A LWR value of 300 W m<sup>-2</sup> was determined using the Stefan-Boltzmann Law ( $I = \epsilon\sigma T^4$ ), which assumes no cloud influence. This value balances heat fluxes during the spinup to retain a vertical deep-firn temperature profile at -16.5°C.

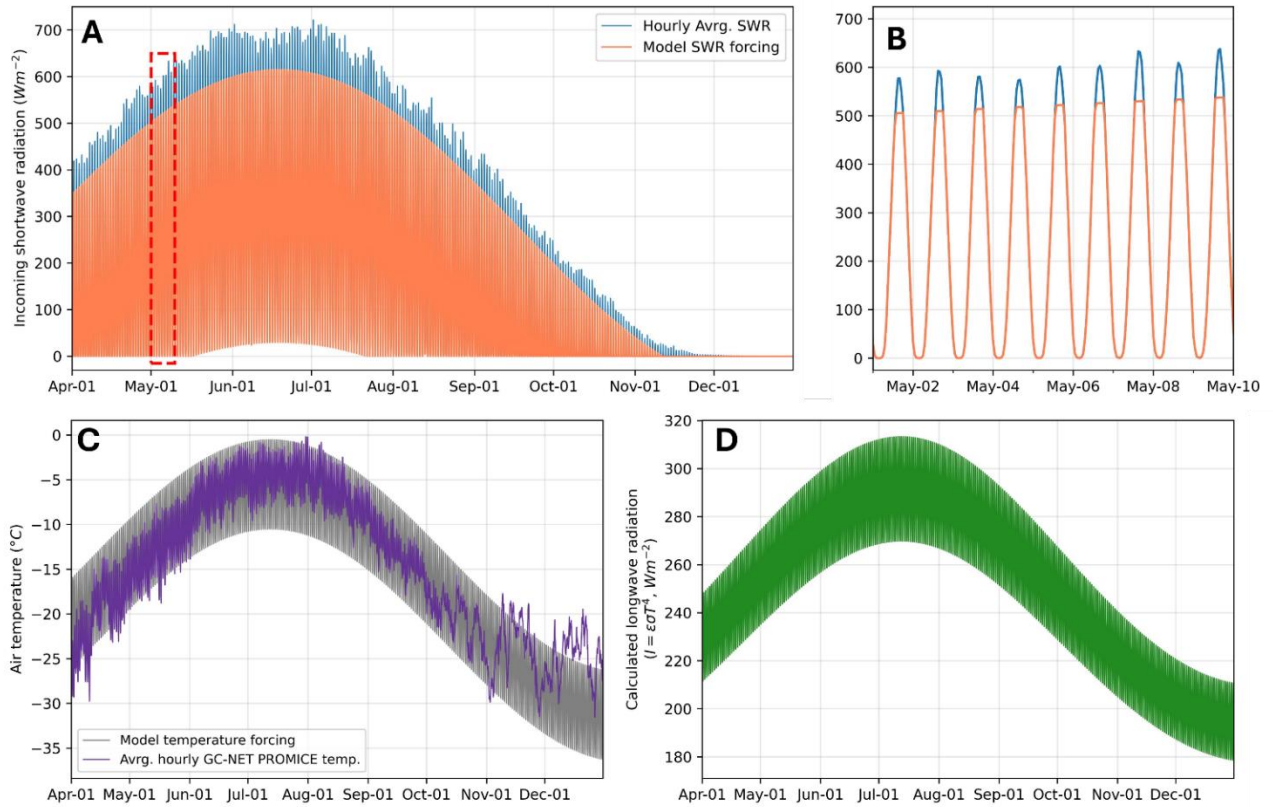

**Figure S1: Meteorological forcings employed in the synthetic Wetting Front and Preferential Flow (Piping) simulations. Forcings span from April 1<sup>st</sup> – December 31<sup>st</sup>.** A) Measured hourly average shortwave radiation values from 1995-2020 at the GC-NET PROMICE weather station, site CP-1998m (blue line). Model SWR forcings were created by trimming local maxima and minima with two envelopes (orange line). The data within the red dashed box are shown in B), a close-up of diurnal fluctuations in the shortwave radiation data/model forcing. C) Measured hourly average air temperature data from 1995-2020 (purple line), also from the CP-1998m weather station. Averages were fit with a sinusoid with a secondary, diurnally fluctuating sinusoid (grey line) to capture approximate air temperature fluctuations throughout the year. Using the sinusoidal air temperature forcings, we directly calculated longwave radiation (D) from temperature using the Stefan-Boltzmann Law.

### 2.3 Synthetic Preferential Flow (Piping) simulation

The spin-up output on July 1<sup>st</sup> was used as the starting firn profile for the liquid water layer perturbation. Three microstructural parameters – grain radius, sphericity, and ‘mk’ – within the spin-up output were edited prior to perturbation. Grain sizes were universally increased by a factor of 1.5x across the firn column to better reflect percolation zone properties. Sphericity values were set to 0.5. The ‘mk’ microstructural parameter (SNOWPACK marker, see Lehning et al. (2002b)) was set to 1, indicating snow had become faceted. All other firn parameters were retained from the July 1<sup>st</sup> spin-up output. We acknowledge the average % liquid water in piping events is unknown, but the heat signature and final layer density ( $\sim 890 \text{ kg m}^{-3}$ ) generated from the properties of the inserted liquid water layer reflect observations.

Site-by-site characteristics, as well as overall site averages, of the two meltwater-induced faceting modes, wet layer onset and preferential flow/piping, are found in Table S3.

**Table S1: Duration, timing, and depths of observed wet layer onset and preferential flow/piping Critical Temperature Gradients (CTGs,  $\geq|\pm 10|$  °C m<sup>-1</sup>) at various sites. Only those sites experiencing either form of CTG are included.**

| Site I.D.          | Msrmt. year | Wet layer CTG date range<br>† |           | Wet lyr. CTG duration (hrs)‡ | Wet lyr. CTG depth ranges (m) |      | # of piping CTG events• | Piping CTG duration (hrs)‡ | Piping CTG depth ranges (m) |      |
|--------------------|-------------|-------------------------------|-----------|------------------------------|-------------------------------|------|-------------------------|----------------------------|-----------------------------|------|
| Site Averages      | -           | -                             | -         | 263.94                       | 0.67                          | 3.31 | -                       | 45.47                      | 2.42                        | 6.06 |
| H3-1540m           | 2008        | 6/13/2008                     | 7/16/2008 | 198                          | 1                             | 3.25 | 1                       | 19.00                      | 2.00                        | 4.75 |
| H2-1555m           | 2008        | 6/9/2008                      | 7/20/2008 | 253                          | 0.25                          | 5.00 | 1                       | 22.00                      | 4.00                        | 5.25 |
| H1-1680m           | 2008        | 6/14/2008                     | 7/17/2008 | 83                           | 0.50                          | 2.25 | 1                       | 22.50                      | 2.50                        | 5.25 |
| H163-1660m         | 2008        | 6/14/2008                     | 7/12/2008 | 76                           | 0.75                          | 3.00 | 1                       | 12.00                      | 2.25                        | 4.25 |
| H165-1680m         | 2008        | 6/14/2008                     | 8/19/2008 | 56.5                         | 0.50                          | 3.00 | 1                       | 12.50                      | 2.25                        | 5.25 |
| T1-1710m           | 2008        | 6/14/2008                     | 8/4/2008  | 100.5                        | 0.25                          | 3.75 | 1                       | 18.50                      | 2.00                        | 3.75 |
| T2-1750m           | 2007        | 6/28/2007                     | 8/4/2007  | 191.5                        | 0.75                          | 5.00 | 1                       | 96.50                      | 3.50                        | 17.0 |
| T3-1818m           | 2007        | 6/25/2007                     | 8/9/2007  | 86.5                         | 1.50                          | 3.50 | 2                       | 120.50                     | 4.00                        | 5.25 |
| T3-1818m, 15m core | 2022        | 7/5/2022                      | 9/9/2022  | 960                          | 0.13                          | 3.50 | 1                       | 110.00                     | 1.50                        | 4.50 |
| T3-1818m, 25m core | 2022        | 7/6/2022                      | 9/11/2022 | 407.5                        | 0.25                          | 4.50 | 2                       | 42.00                      | 1.75                        | 9.00 |
| T4-1878m           | 2007        | 7/3/2007                      | 8/1/2007  | 268.5                        | 0.75                          | 3.00 | 1                       | 4.50                       | 1.00                        | 9.00 |
| T4-1878m           | 2022        | 7/6/2022                      | 8/5/2022  | 260                          | 0.25                          | 1.25 | 1                       | 3.00                       | 0.75                        | 3.00 |
| T4-1878m           | 2023        | 7/9/2023                      | 7/23/2023 | 155                          | 1.50                          | 3.75 | 1                       | 2.00                       | 5.00                        | 6.00 |
| T5-1928m           | 2023        | 7/10/2023                     | 7/22/2023 | 157.5                        | 0.75                          | 4.00 | 1                       | 190.00                     | 2.25                        | 7.75 |
| CP-1998m           | 2007        | 6/25/2007                     | 7/28/2007 | 603                          | 0.75                          | 2.25 | -                       | -                          | -                           | -    |
| CP-1998m           | 2023        | 7/6/2023                      | 7/18/2023 | 226.5                        | 1.25                          | 2.75 | 1                       | 44.00                      | 2.50                        | 4.75 |
| UP18-2102m         | 2023        | 7/8/2023                      | 7/29/2023 | 504                          | 0.25                          | 2.50 | 1                       | 8.50                       | 1.50                        | 2.25 |

† Date ranges encompass the minimum and maximum dates in which CTGs associated with wet layer onset were observed. CTGs were not necessarily observed continuously over the specified range.

‡ Temperature gradient durations are the cumulative time in which temperature gradients associated with each scenario were observed within their respective date ranges. Gaps where CTGs were not observed were not included in duration calculations.

• Observation dates denote the first date in which CTGs associated with breakaway infiltration were observed.

## References

- Fausto, R. S., Box, J. E., Vandecrux, B., van As, D., Steffen, K., Macferrin, M. J., Machguth, H., Colgan, W., Koenig, L. S., McGrath, D., Charalampidis, C., Braithwaite, R. J.: A snow density dataset for improving surface boundary conditions in Greenland ice sheet firn modelling, *Front. Earth Sci.*, 6, <https://doi.org/10.3389/feart.2018.00051>, 2018.
- 55 Herron, M. M., & Langway, C. C.: Firn Densification: An Empirical Model, *J. Glaciol.*, 25, 373–385, <https://doi.org/10.3189/s0022143000015239>, 1980.
- Howat, I. M.: Temporal variability in snow accumulation and density at Summit Camp, Greenland ice sheet, *J. Glaciol.*, 68, 1076–1084, <https://doi.org/10.1017/jog.2022.21>, 2022.
- Lehning, M., Bartelt, P., Brown, B., Fierz, C., and Satyawali, P.: A physical SNOWPACK model for the Swiss avalanche  
60 warning Part II. Snow microstructure, *Cold Reg. Sci. Technol.*, 35, 147–167, 2002b.
- McDowell, I. E., Keegan, K. M., Wever, N., Osterberg, E. C., Hawley, R. L., & Marshall, H. P.: Firn Core Evidence of Two-Way Feedback Mechanisms Between Meltwater Infiltration and Firn Microstructure From the Western Percolation Zone of the Greenland Ice Sheet, *J. Geophys. Res. Earth Surf.*, 128, <https://doi.org/10.1029/2022JF006752>, 2023.
- Noël, B. P.: Rapid ablation zone expansion amplifies north Greenland mass loss: modelled (RACMO2) and observed (MODIS)  
65 data sets, PANGAEA, 2019.
- Saito, J., Harper, J., and Humphrey, N.: Uptake and Transfer of Heat Within the Firn Layer of Greenland Ice Sheet's Percolation Zone, *J. Geophys. Res. Earth. Surf.*, 129, <https://doi.org/10.1029/2024JF007667>, 2024.
- Steffen, K., Vandecrux, B., Houtz, D., Abdalati, W., Bayou, N., Box, J. E., Colgan, W. T., Espona Pernas, L., Griessinger, N., Haas-Artho, D., Heilig, A., Hubert, A., Iosifescu Enescu, I., Johnson-Amin, N., Karlsson, N. B., Kurup Buchholz, R.,  
70 McGrath, D., Cullen, N. J., Naderpour, R., Molotch, N. P., Pedersen, A. Ø., Perren, B., Philipps, T., Plattner, G. K., Proksch, M., Revheim, M. K., Sørrelse, M., Schneebli, M., Sampson, K., Starkweather, S., Steffen, S., Stroeve, J., Watler, B., Winton, Ø. A., Zwally, J., and Ahlstrøm, A.: GC-Net Level 1 historical automated weather station data, 2022.
